# Supplementary material for: An origami paper-based analytical device for DNA damage analysis
Source: Royal Society of Chemistry journal article supplement (doi:10.1039/d1cc05019b), 2021-01-01
Supplement: d1cc05019b1.pdf [file d1cc05019b1.pdf]

## **Supporting information**

### **Origami Paper-Based Analytical Device for DNA Damage Analysis**

**Chemicals and reagents.** TUNEL Apoptosis Detection Kit (FITC) was purchased from YEASEN (Shanghai, China). The forward primers (actbF: 5'-GGCCCATCCATCGTTCACAG-3') and reverse primers (actbR: 5'-CGAGAGTTTAGGTTGGTCGTTTCG-3') were synthesized by TaKaRa Bio Inc. (Dalian, China). Human alkyladenine DNA glycosylase (AAG), formamidopyrimidine-DNA glycosylase (FPG), Nuclease P1 and apurinic/apyrimidinic endonuclease (APE) were acquired from New England Biolabs (Beijing, China). Phosphate Buffered Saline (PBS), Dulbecco's Modified Eagle Medium (DMEM), Fetal Bovine Serum (FBS), 0.25% Trypsin-EDTA and Calf Intestinal Alkaline Phosphatase (CIAP) were obtained from Thermo Scientific (Shanghai, China). N7-Methylguanine (7meG) was purchased from Macklin (Shanghai, China). 8-oxo-7,8-dihydro-2-deoxyguanosine (8oxodG) was purchased from Aladdin (Shanghai, China). MTT Cell Proliferation and Cytotoxicity Assay Kit was purchased from BBI Life Sciences (Shanghai, China). Triton X-100 cell lysis buffer was obtained from NOVON (Beijing, China). TIANamp Genomic DNA Kit was purchased from TIAN GEN (Beijing, China). Deoxyribonuclease II (DNase II), phosphodiesterase I and all other chemicals were purchased from Sigma-Aldrich.

**Fabrication of oPAD.** The paper device was designed using a Microsoft PowerPoint. Wax was printed onto Whatman Grade 1 using a solid wax printer (Xerox Color Qube 8570), followed by heating at 120°C for 1 min. This produced a patterned paper with a circular testing zone (0.4 cm in diameter). 5  $\mu$ L of Triton X-100 cell lysis buffer was applied onto panel A, and all-TUNEL reagents containing 1  $\mu$ L of 10  $\times$  TdT reaction buffer (TRB), 1  $\mu$ L of 350 nM TdT, 2  $\mu$ L of 100  $\mu$ M FdU in 10% (w/v) pullulan solution were printed onto panel B. After dried at RT, a transparent film was formed onto the paper. The paper device was stored in a desiccant container.

**TUNEL reaction on paper.** ZFL cells ( $\sim 10^6$ ) were first exposed to 50 mM H<sub>2</sub>O<sub>2</sub> for 30 min. Genomic DNA was extracted by a DNA extraction kit according to the manufacturer's instructions. 1  $\mu$ L of genomic DNA (2 ng), 1  $\mu$ L of 10  $\times$  TRB, 1  $\mu$ L of 350 nM TdT, and 2  $\mu$ L of 100  $\mu$ M FdU (final volume: 10  $\mu$ L) were added onto the

paper chip. The mixture was incubated at room temperature (RT) for 20 min before adding 5  $\mu\text{L}$  of 0.5 M EDTA (pH 8.0) to stop the TUNEL reaction. After washed twice with 20  $\mu\text{L}$  of 1  $\times$  PBS, the paper well was imaged, and the fluorescence intensity was quantified by ImageQuant software. In terms of reaction kinetics on paper, 1  $\mu\text{L}$  of genomic DNA (0.2 ng) was tested according to the protocol described above.

**Detection of 3' OH ends by standard TUNEL assay.** The  $\text{H}_2\text{O}_2$ -treated ZFL cells were fixed with 4% paraformaldehyde for 20 min, and then incubated with 20  $\mu\text{g}/\text{mL}$  proteinase K in 1  $\times$  PBS for 10 min. These cells were mixed with 35 nM TdT and 20  $\mu\text{M}$  FdU in 1  $\times$  TRB, and incubated at 37  $^\circ\text{C}$  for 60 min. Followed by washing, and staining with DAPI for 15 min, these cells were imaged using a confocal laser scanning microscope.

**Detection of 3' OH ends by oPAD.** For measuring 3' OH ends in genomic DNA, 1  $\mu\text{L}$  of DNA with different amounts (0.17 pg, 1.7 pg, 17 pg, 170 pg, 1.7 ng, 17 ng, and 170 ng) was applied to panel A. By folding the device (panels B and A are folded together and onto panel C), 10  $\mu\text{L}$  of dd $\text{H}_2\text{O}$  was added onto panel B to rehydrate the TUNEL reagents. The released components will migrate to panel A driven by vertical capillary action. Following incubation at RT for 20 min, panel A was washed twice with 20  $\mu\text{L}$  of 1 $\times$  PBS. The fluorescence intensity was quantified by ImageQuant software.

For measuring 3' OH ends in cells, ZFL cells ( $\sim 10^6$ ) were first treated with 50 mM  $\text{H}_2\text{O}_2$  for 30 min. 10  $\mu\text{L}$  of cell samples with different numbers (1, 10,  $10^2$ ,  $10^3$ ,  $10^4$ , and  $10^5$ ) were added onto panel A. Followed by lysis at RT for 5 min, the paper chip was washed twice using 50  $\mu\text{L}$  of 1 $\times$  PBS. By folding the device as described above, 10  $\mu\text{L}$  of dd $\text{H}_2\text{O}$  was added onto panel B to rehydrate TUNEL reagents. The TUNEL reaction was allowed to proceed at RT for 20 min on panel A before washed twice with 20  $\mu\text{L}$  of 1 $\times$  PBS. The fluorescence signal was recorded and analyzed by ImageQuant software.

**Detection of 7meG sites by oPAD.** For the fabrication of oPAD, 5  $\mu\text{L}$  of 10% (w/v) pullulan mixtures containing 10 U AAG and 10 U of APE were printed onto the dried pullulan film containing TUNEL reagents on panel B. ZFL cells ( $\sim 10^5$ ) were first exposed to 1 mM DMS at 0°C for 30 min. The protocol for measuring 7meG in cells was similar to the one described above.

**Analysis of genotoxicity of environmental toxicants.** ZFL cells ( $\sim 10^6$ ) were exposure to different concentrations of ZnO (3  $\mu\text{M}$ , 12  $\mu\text{M}$ , 48  $\mu\text{M}$ , and 192  $\mu\text{M}$ ),  $\text{K}_2\text{CrO}_4$  (75  $\mu\text{M}$ , 150  $\mu\text{M}$ , 300  $\mu\text{M}$ , and 600  $\mu\text{M}$ ) and paraquat (120  $\mu\text{M}$ , 240  $\mu\text{M}$ , 480  $\mu\text{M}$ , and 960  $\mu\text{M}$ ) at 37 °C for 4 h. These cells ( $\sim 5 \times 10^5$ ) were then applied to panel A according to the protocol described above.

**Dissociation of ZFL cells from primary tissue of zebrafish.** The liver tissue of zebrafish was first cut into 3 to 4 mm pieces using a sterile scissors. After washing twice with  $1 \times \text{PBS}$ , 400  $\mu\text{L}$  of 0.25% trypsin-EDTA was added, and incubated at room temperature (RT) for 2 min. The obtained cell suspension was mixed with 800  $\mu\text{L}$  of DMEM, and filtered through a sterile nylon mesh to separate the cells and tissue fragments. The obtained mixture was then centrifuged at 2,000 g at 4 °C for 10 min. The purified ZFL cells were re-suspended in DMEM containing 10% FBS, 100 U/mL penicillin and 100  $\mu\text{g}/\text{mL}$  streptomycin, and used in the following study.

**DNA extraction efficiency of paper.** 5  $\mu\text{L}$  of ZFL cells (1, 10,  $10^2$ ,  $10^3$ ,  $10^4$ , and  $10^5$ ) were applied onto panel A for cell lysis. After 5 min, the paper chip was washed twice with 50  $\mu\text{L}$  of  $1 \times \text{PBS}$ . The extracted DNA was quantified by RT-PCR. Thermal cycles were typically performed as follows: 95 °C for 3 min, n cycles of 94 °C for 30 s, 58 °C for 30 s and 72 °C for 45 s; 72 °C for 10 min.

**Comet assay.** The treated ZFL cells were firstly mixed with PBS containing 0.7% agarose at 37 °C, and pipetted onto the agarose-covered (PBS with 1% normal agarose) slides. After incubation at 4 °C for 10 min, the slides were immersed into the lysis buffer (2.5 M NaCl, 100 mM  $\text{Na}_2\text{EDTA}$ , 10 mM Tris, 1% sodium lauroyl sarcosine, 1% Triton-X-100, 10% DMSO, pH = 10) at 4 °C for 90 min under dark conditions. After washed twice with ddH<sub>2</sub>O, electrophoresis was carried out in

alkaline electrophoresis buffer (1 mM Na<sub>2</sub>EDTA and 300 mM NaOH, pH = 13) at 25 V, 300 mA for 20 min at 4 °C. The slides were washed three times with ddH<sub>2</sub>O and immersed into the neutralization buffer (0.4 M Tris, pH 7.5) for 15 min. The genomic DNA was stained with GelRed for 60 min, and imaged using a fluorescence microscope. The degree of DNA damage was assessed by the distance between the center of the head and the tail, defined as the olive tail moment (OTM).

#### **Detection of modified bases using LC-MS<sup>2</sup>.**

5 µg of extracted alkylated DNA was first mixed with 10 U AAG in 100 µL of 1× TRB at 37 °C for 60 min. 7meG was collected by centrifugation through a 3 K membrane (NANOSEP OMEGA, Pall Incorporation) at 5,000 g for 30 min. 10 µg of genomic DNA extracted from H<sub>2</sub>O<sub>2</sub>/Fe<sup>2+</sup>-treated cells was mixed with 10 U Nuclease P1, 5 U DNase I, 0.002 U phosphodiesterase I and 10 U CIAP in 100 µL of 1× TRB at 37 °C for 60 min. 8oxodG was obtained by centrifugation through a 3 K membrane at 5,000 g for 30 min. 7meG and 8oxodG were then analyzed by QQQ LC/MS<sup>2</sup> (Agilent 6410 B) with a XTERRA<sup>®</sup> MS C18 column (2.1×100 mm, 3.5 µm) at a flow rate of 0.25 mL/min at 40 °C. 5 mM NH<sub>4</sub>OAc and CH<sub>3</sub>CN were used as the mobile phase. The gradient elution started with 5% CH<sub>3</sub>CN, increasing to 40% CH<sub>3</sub>CN in 10 min, then held for 2 min. It returned to 5% CH<sub>3</sub>CN in 0.01 min, and then held for 7 min for column back-conditioning. 7meG was detected by multiple reaction monitoring (MRM) using mass transition (precursor ions→ product ions, m/z 166.0 → m/z 149.0) for quantification, (precursor ions→ product ions, m/z 166.0 → m/z 124.0) for confirmation. The ion source parameters were as follows: gas temperature, 350 °C; gas flow, 8 L/min; nebulizer, 25 psi. 8oxodG was detected by multiple reaction monitoring (MRM) using mass transition (precursor ions→ product ions, m/z 284.0 → m/z 168.0) for quantification, (precursor ions→ product ions, m/z 284.0 → m/z 140.0) for confirmation.

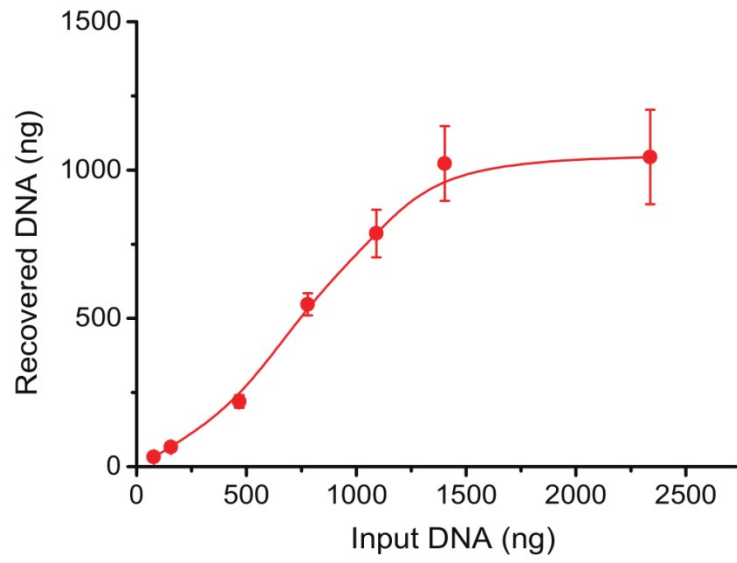

**Figure S1.** Characterization of DNA binding capacity of Whatman filter paper (Grade 1) using RT- PCR.

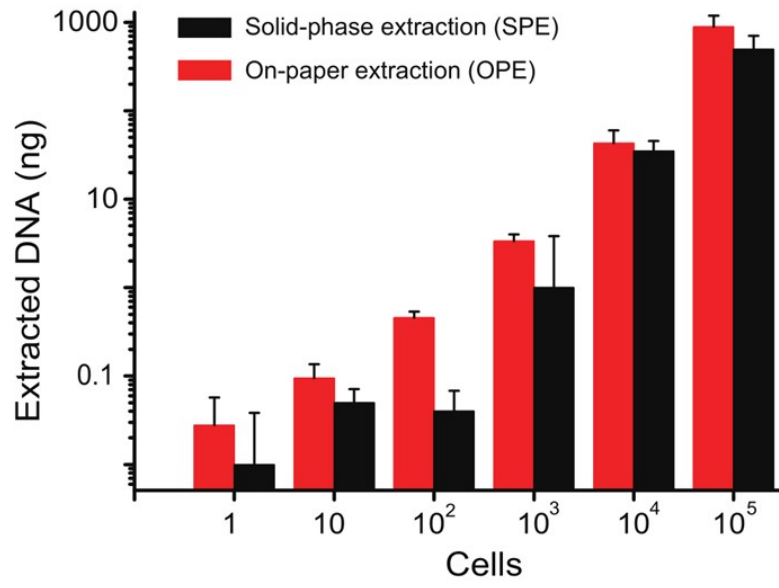

**Figure S2.** Comparison of DNA extraction yields between on-paper DNA extraction method and traditional solid-phase extraction method.

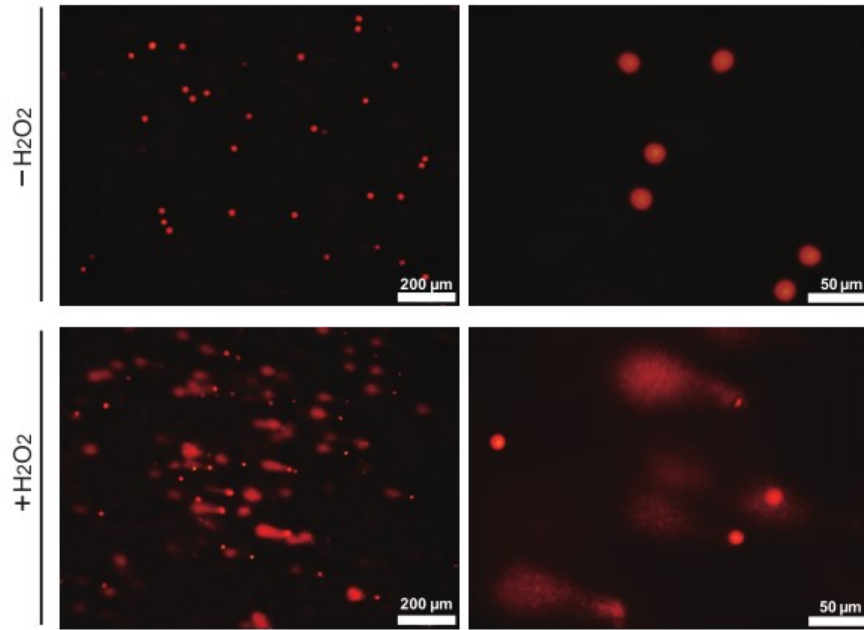

**Figure S3.** Traditional comet assay for examining DNA damage in ZFL cells. ZFL cells were first treated with or without 50 mM H<sub>2</sub>O<sub>2</sub> at RT for 30 min.



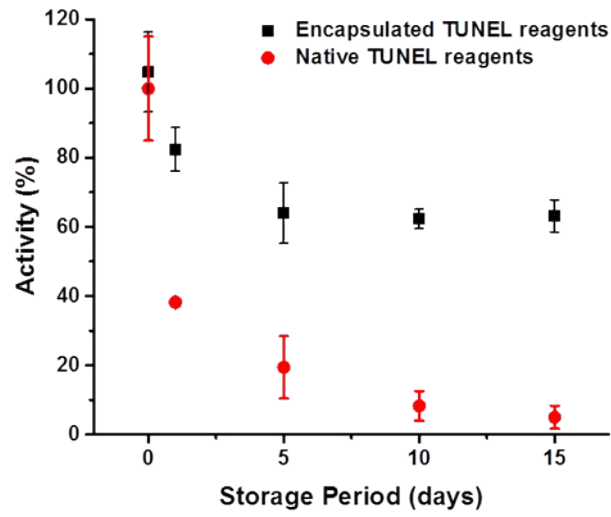

**Figure S4.** TdT activity loss during room-temperature storage with and without pullulan encapsulation.

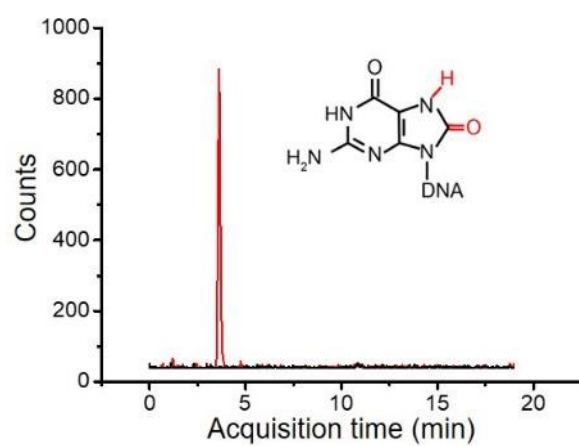

**Figure S5.** Multiple reaction monitoring (MRM) chromatogram of 8oxodG in ZFL cells pre-treated with 5 mM H<sub>2</sub>O<sub>2</sub> and 1 mM Fe<sup>2+</sup> at 37 °C for 2 h (red line). Non-treated ZFL cells were used as control (black line).

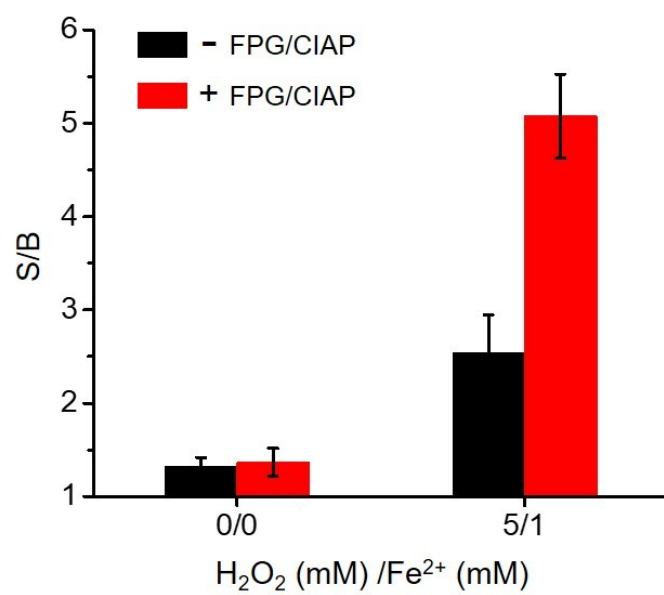

**Figure S6.** Fluorescence intensity of paper chips for H<sub>2</sub>O<sub>2</sub>/Fe<sup>2+</sup>-treated and non-treated ZFL cells following TUNEL or FPG/CIAP-mediated TUNEL.

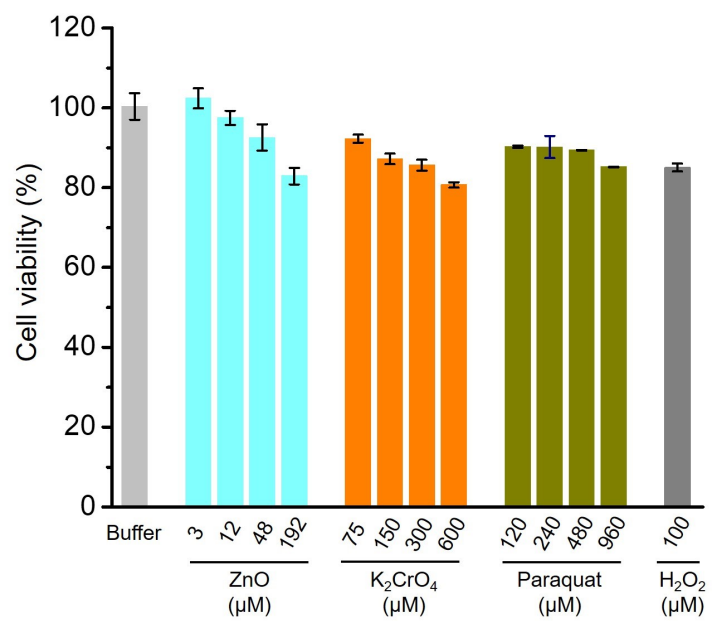

**Figure S7.** Cellular viability assessment of ZFL cells exposed to different concentrations of ZnO, K<sub>2</sub>CrO<sub>4</sub>, and paraquat.

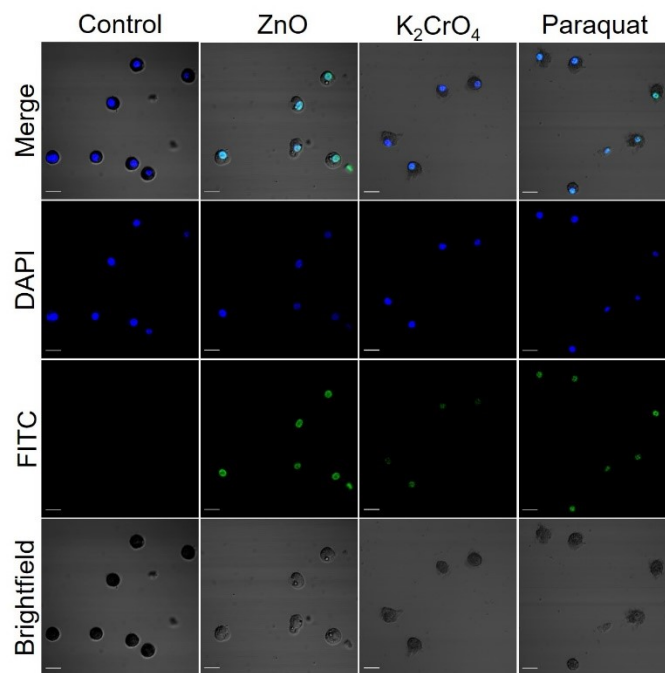

**Figure S8.** CLSM images of TUNEL reaction in ZFL cells after being treated with ZnO (48  $\mu$ M), K<sub>2</sub>CrO<sub>4</sub> (300  $\mu$ M), and paraquat (480  $\mu$ M). Scale bar: 10  $\mu$ m.

**Table S1.** Comparison of Comet assay, traditional TUNEL and paper-based TUNEL assay for measuring DNA damages.

| <b>Comet Assay</b> | <b>Time</b> | <b>Traditional<br/>TUNEL</b> | <b>Time</b> | <b>Paper-based<br/>TUNEL</b> | <b>Time</b> |
|--------------------|-------------|------------------------------|-------------|------------------------------|-------------|
| Cell lysis         | 90 min      | Cell fixation                | 20 min      | Cell lysis                   | 5 min       |
| Washing            | 2 min       | Digestion                    | 10 min      | Washing                      | 2 min       |
| Electrophoresis    | 20 min      | TUNEL                        | 60 min      | TUNEL                        | 20 min      |
| Washing            | 2 min       | Washing                      | 2 min       | Washing                      | 2 min       |
| Neutralization     | 15 min      | DNA Staining                 | 15 min      | Imaging                      | 1 min       |
| DNA Staining       | 60 min      | Washing                      | 2 min       |                              |             |
| Imaging            | 1 min       | Imaging                      | 1 min       |                              |             |
